# Supplementary material for: Ultralight biomass-derived carbon fibre aerogels for electromagnetic and acoustic noise mitigation
Source: Royal Society of Chemistry journal article supplement (doi:10.1039/d2ta06402b), 2022-01-01
Supplement: d2ta06402b1.pdf [file d2ta06402b1.pdf]

## **Ultralight Biomass-derived Carbon Fibre Aerogels for Electromagnetic and Acoustic Noise Mitigation**

Yi Hou<sup>1#</sup>, Jing Quan<sup>2#</sup>, Ba Quoc Thai<sup>1</sup>, Yijing Zhao<sup>2</sup>, Xiaoling Lan<sup>2</sup>, Xiang Yu<sup>3</sup>, Wei Zhai<sup>2</sup>, Yong Yang<sup>1\*</sup>, and Boo Cheong Khoo<sup>2</sup>

<sup>1</sup> National University of Singapore, 117411, Singapore

<sup>2</sup> Department of Mechanical Engineering, National University of Singapore, 9 Engineering Drive 1, 117575, Singapore

<sup>2</sup> Institute of High Performance Computing, A\*STAR, 138632, Singapore

\*Corresponding author. E-mail: [tslyayo@nus.edu.sg](mailto:tslyayo@nus.edu.sg)

#These authors contributed to the work equally and should be regarded as co-first authors

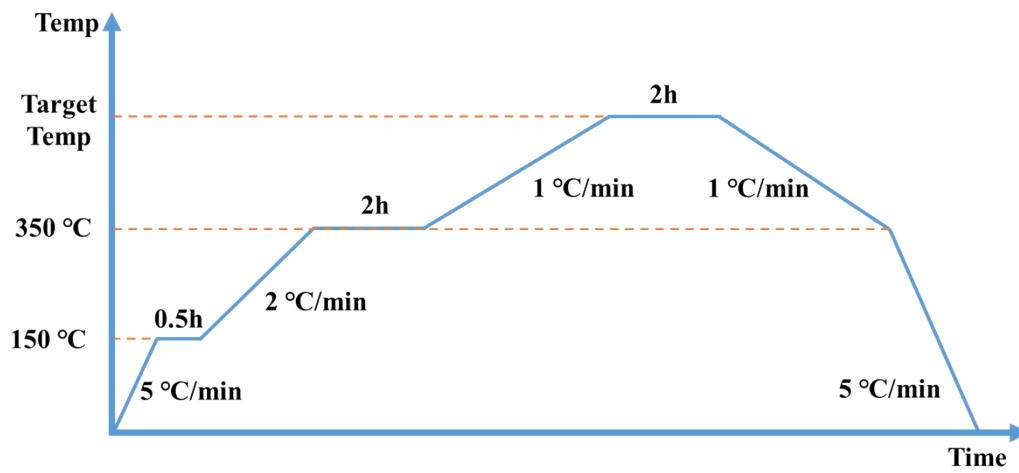

**Fig. S1.** Heating program for the carbonization process of SA

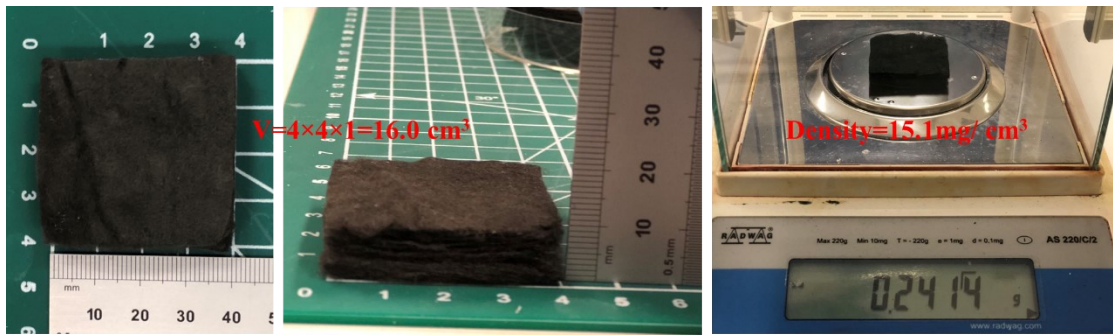

**Fig. S2** Illustration of the weight and volume measurement for SA-670 sample.

**Table S1.** Comparison of density for silk fibres, SA-650/670/700/1500.

| Sample                        | Silk | SA-650 | SA-670 | SA-700 | SA-1500 |
|-------------------------------|------|--------|--------|--------|---------|
| Density/(mg/cm <sup>3</sup> ) | 18.5 | 14.7   | 15.1   | 15.4   | 11.8    |

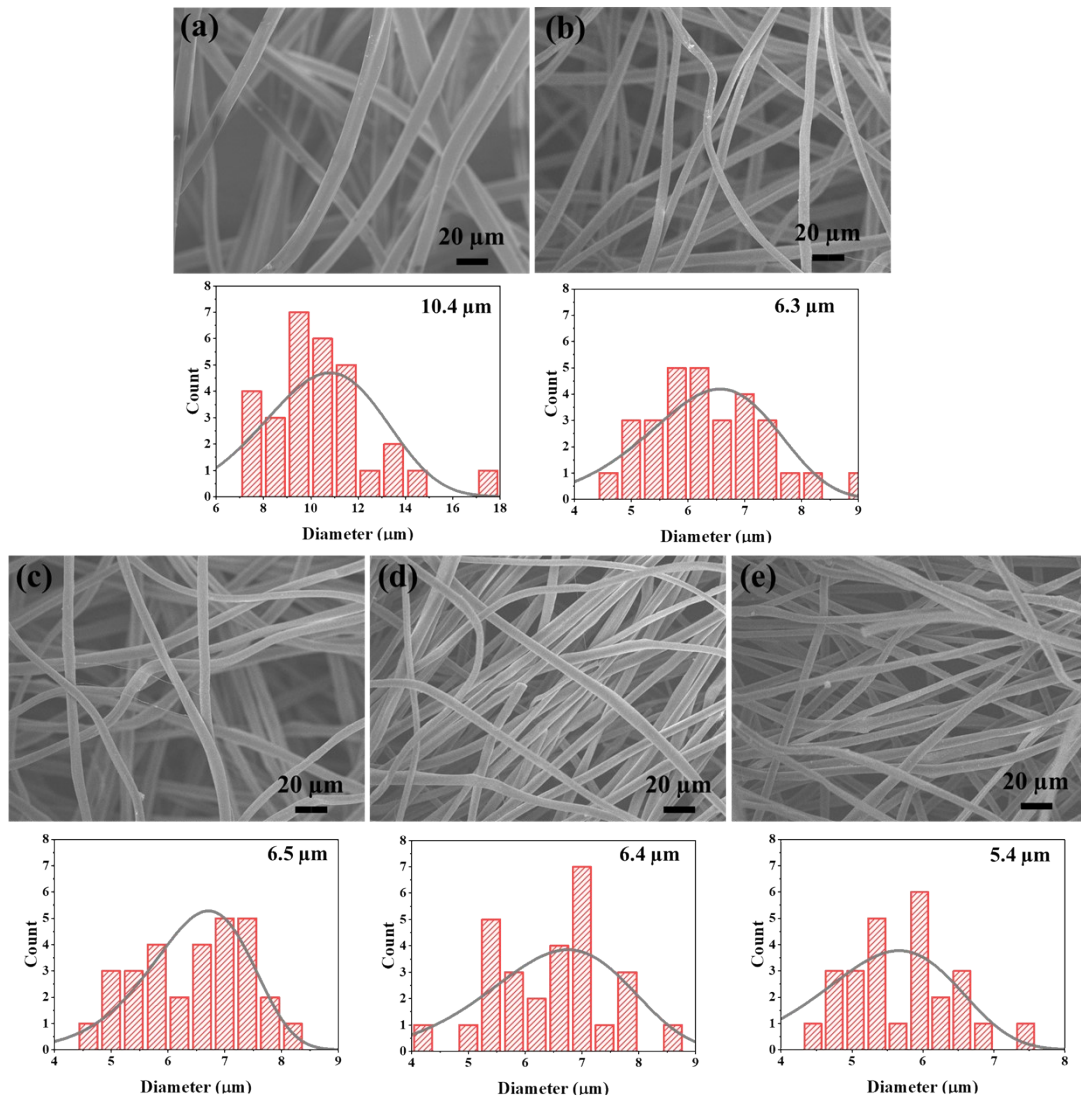

**Fig. S3.** SEM images and the fibre size distribution of (a) silk fibres, (b) SA-650, (c) SA-670, (d) SA-700 and (e) SA-1500

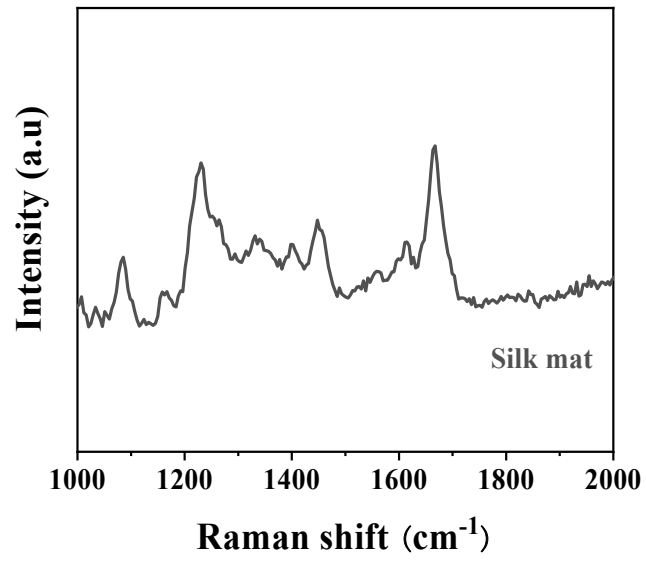

**Fig. S4.** Raman spectrum of degummed silk fibres

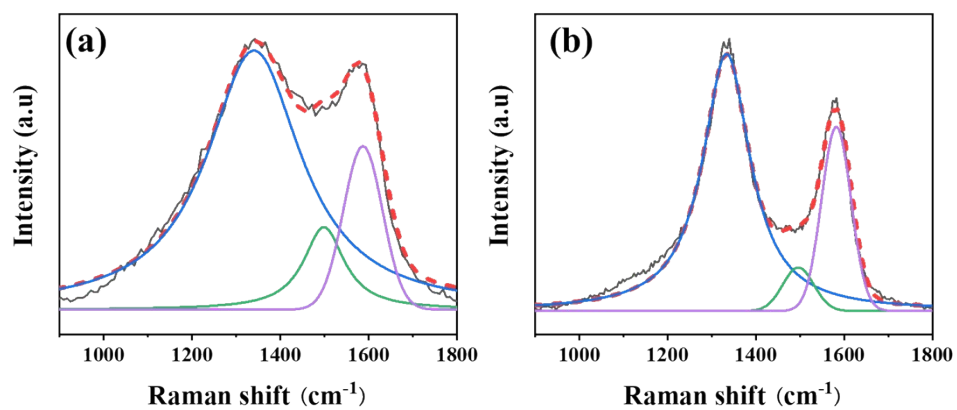

**Fig. S5.** Mixed Gaussian–Lorentzian fitting for D and G bands of Raman spectra for (a) SA-670 and (b) SA-1500

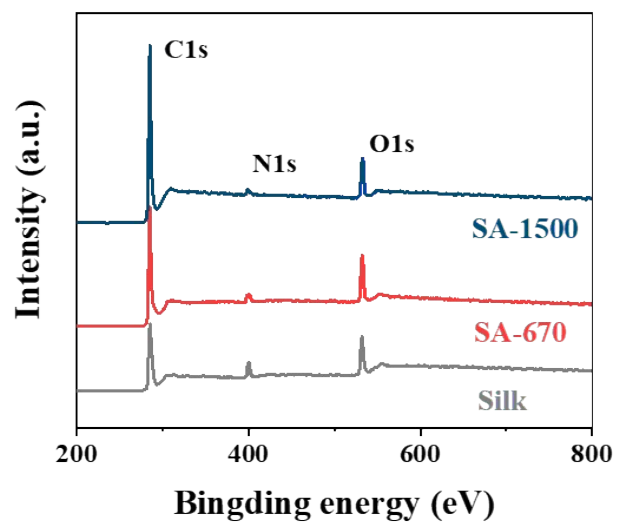

**Fig. S6.** Comparison of XPS survey spectra for degummed silk fibres, SA-670 and SA-1500.



**Table S2.** Comparison of element contents obtained from XPS analysis for degummed silk fibres, SA-670 and SA-1500.

| Sample  | C<br>at% | O<br>at% | N<br>at% |
|---------|----------|----------|----------|
| Silk    | 73.7     | 16.9     | 9.4      |
| SA-670  | 77.5     | 15.0     | 7.4      |
| SA-1500 | 86.9     | 10.2     | 2.9      |

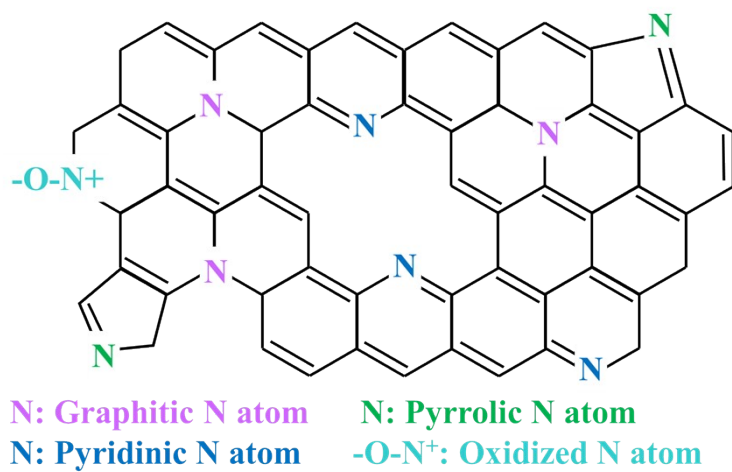

**Fig. S7.** Schematic diagram of N-doped graphene with graphitic N, pyrrolic N, pyridinic N and oxidized N atoms.

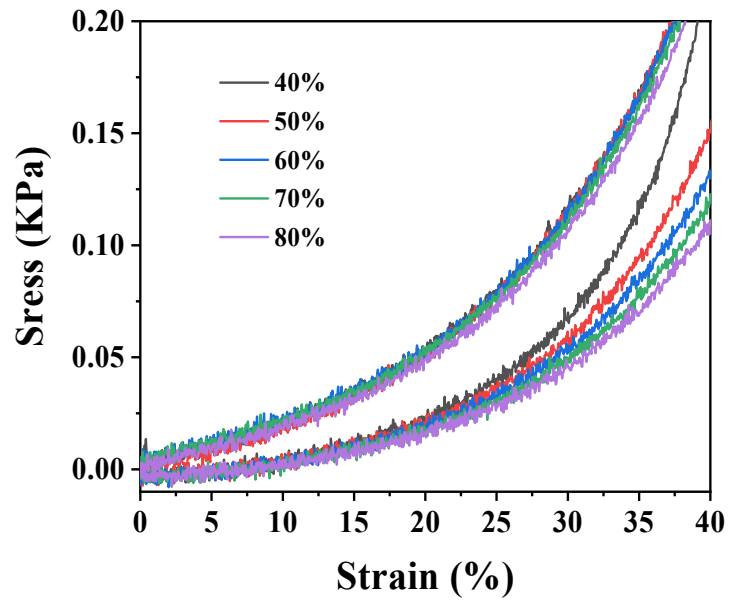

**Fig. S8.** Stress-strain curves of SA-670 with set strains from 40% to 80% (Partially enlarged view)

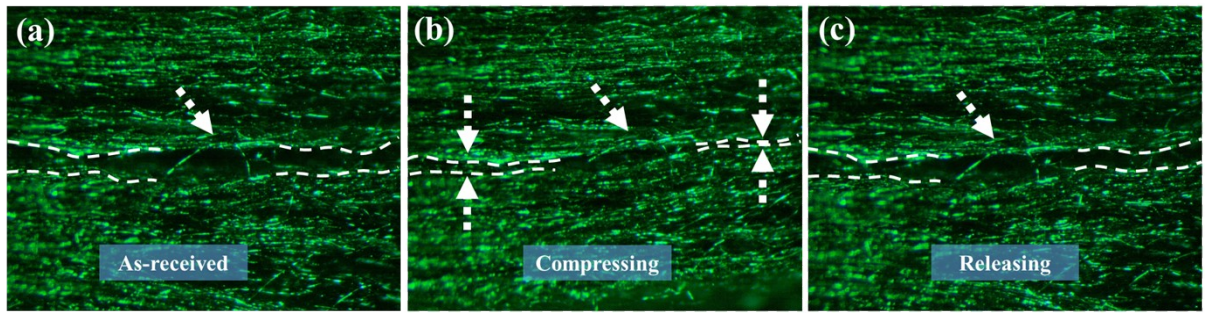

**Fig. S9.** Cross-section morphology changes of SA-670 during a compressing-releasing cycle.

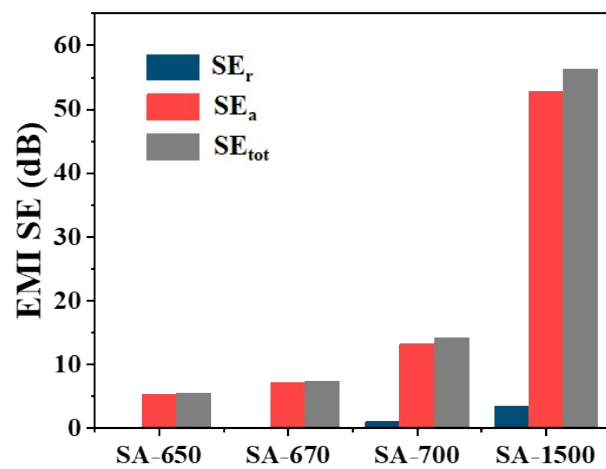

**Fig. S10.** Average EMI SE<sub>r</sub>, SE<sub>a</sub> and SE<sub>tot</sub> of SA samples with different annealing temperatures.

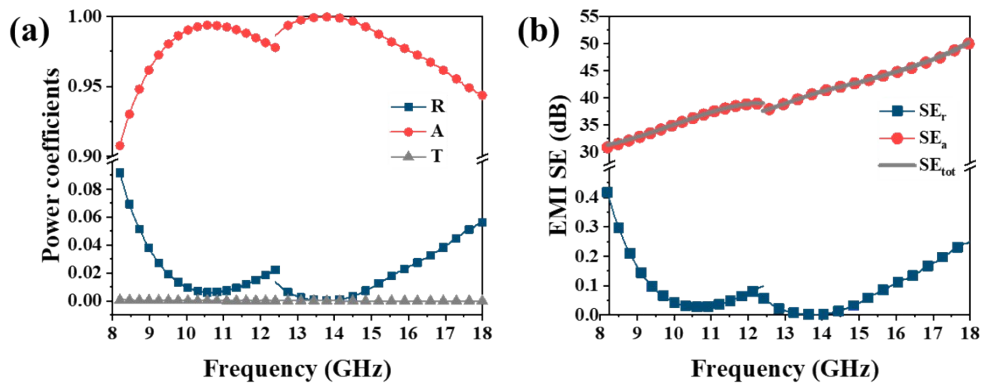

**Fig. S11.** Frequency dependent: (a) power coefficients and (b) EMI shielding effectiveness ( $SE_r/SE_a/SE_{tot}$ ) of SA-670/1500 in X+Ku band

**Table S3** Comparison of EMI shielding performance for some reported materials

| Type           | Materials                                                                  | EMI shielding properties (average values) |          |         |                    | Testing Frequency<br>GHz | Density<br>mg/cm <sup>3</sup> | ref |
|----------------|----------------------------------------------------------------------------|-------------------------------------------|----------|---------|--------------------|--------------------------|-------------------------------|-----|
|                |                                                                            | A<br>/dB                                  | R<br>/dB | A/(A+R) | EAB(A>0.9)/<br>GHz |                          |                               |     |
| CNT            | VMQ/Fe <sub>3</sub> O <sub>4</sub><br>@MWCNT/<br>Ag@NWF composite<br>foams | 0.427                                     | 0.573    | 0.427   | 0.8(7.6-8.4)       | 2-18                     | 380                           | 1   |
|                | VMQ/MWCNTs/Fe <sub>3</sub><br>O <sub>4</sub> nanocomposite<br>foam         | ~0.650                                    | ~0.350   | 0.650   | 0                  | 8.2-12.4                 | 320                           | 2   |
|                | MWCNT/graphene<br>WPU/Textile<br>composite textile film                    | 0.735                                     | 0.265    | 0.735   | 0                  | 8.2-12.4                 | ~1000                         | 3   |
|                | VMQ/Ag@GF/MWC<br>NT/Fe <sub>3</sub> O <sub>4</sub> composite<br>foams      | 0.820                                     | 0.180    | 0.820   | 0.2(8.2-8.5)       | 2-18                     | 500-1500                      | 4   |
|                | TPU/CNT composite                                                          | 0.50                                      | 0.500    | 0.500   | 0                  | 8.2-12.4                 | 1200                          | 5   |
| rGO            | rGO@Fe <sub>3</sub> O <sub>4</sub> /T-<br>ZnO/Ag/WPU film                  | 0.610                                     | ~0.390   | 0.610   | 0.7(9.8-10.5)      | 8.2-12.4                 | ~1500                         | 6   |
|                | EBAg/FeCo@rGO/<br>WPU composite<br>foam                                    | 0.920                                     | 0.080    | 0.920   | 1.8(8.2-10)        | 8.2-12.4                 | ~3500                         | 7   |
|                | PDMS/rGO/SWCNT<br>nanocomposite                                            | 0.780                                     | 0.220    | 0.780   | 0                  | 8.2-12.4                 | ~1200                         | 8   |
|                | rGO/Carbon/polyuret<br>hane aerogel                                        | 0.590                                     | 0.410    | 0.590   | 0                  | 8.2-12.4                 | 100                           | 9   |
|                | CCA@rGO/PDMS<br>composite                                                  | 0.320                                     | 0.680    | 0.320   | 0                  | 8.2-12.4                 | ~1200                         | 10  |
| C<br>nanofiber | Co/C@CNF-900<br>aerogel                                                    | ~0.800                                    | ~0.200   | ~0.800  | 0                  | 8.2-12.4                 | 1.74                          | 11  |
|                | CNF/AgNW@Fe <sub>3</sub> O <sub>4</sub><br>composite sponges               | 0.600                                     | 0.400    | 0.600   | 0                  | 8.2-12.4                 | 170                           | 12  |
| MXene          | Polymer/MXene<br>composite foams                                           | 0.945                                     | 0.0500   | 0.950   | 2.77(5.4-8.17)     | 5.38-8.17                | ~300                          | 13  |
|                | MXene(Ti <sub>3</sub> C <sub>2</sub> Tx)/A<br>NFs hybrid aerogels          | 0.0856                                    | 0.914    | 0.0856  | 0                  | 8.2-12.4                 | 84.0                          | 14  |

|       |                                                                                 |         |         |          |               |             |        |      |      |
|-------|---------------------------------------------------------------------------------|---------|---------|----------|---------------|-------------|--------|------|------|
|       | MXene aerogel                                                                   | 0.910   | 0.090   | 0.910    | 4.2(8.2-12.4) | 8.2-12.4    | 62.6   | 15   |      |
| Metal | Laminated Al film w/<br>η-gradient film                                         | 0.990   | 0.00960 | 0.990    | 8.5(1.5-10)   | 1.5-10      | ~270   | 16   |      |
|       | BiFeO <sub>3</sub> /<br>BaFe <sub>7</sub> (MnTi) <sub>2.5</sub> O <sub>19</sub> | ~0.625  | ~0.300  | ~0.676   | 0             | 8.2-12.4    | ~8000  | 17   |      |
|       | composite                                                                       |         |         |          |               |             |        |      |      |
|       | EP/NCCF/ACET<br>foam                                                            | 0.590   | 0.410   | 0.590    | 0             | 8.2-12.4    | 210    | 18   |      |
|       | TPU/CIP/Ni mesh<br>composite                                                    | 0.630   | 0.370   | 0.630    | 0             | 18-26.5     | ~1500  | 19   |      |
| SA    | SA-<br>670/1500                                                                 | Average | 0.979   | 0.02086  | 0.979         | 9.8(8.2-18) | 8.2-18 | 15.1 | ours |
|       |                                                                                 | Peak    | 0.9998  | 0.000149 | 0.99985       |             |        |      |      |



**Table S4** Comparison of sound absorption performance for some reported materials

| Materials                                                               | NRC  | Density(mg/cm <sup>3</sup> ) | Thickness(mm) | ref  |
|-------------------------------------------------------------------------|------|------------------------------|---------------|------|
| PAN/PVB-PET nanofiber aerogel                                           | 0.41 | 10.76                        | 20            | 20   |
| SiO <sub>2</sub> /rGO nanofiber sponge                                  | 0.56 | 9.33                         | 30            | 21   |
| Y <sub>2</sub> Zr <sub>2</sub> O <sub>7</sub> flexible fibrous membrane | 0.60 | 44                           | 30            | 22   |
| Kenaf fibers                                                            | 0.50 | 50                           | 60            | 23   |
| Hemp fibers                                                             | 0.39 | 50                           | 30            | 23   |
| Coconut fibers                                                          | 0.49 | 60                           | 50            | 23   |
| Cane bark                                                               | 0.45 | 145                          | 40            | 23   |
| GO-melamine foam                                                        | 0.58 | 24.12                        | 26            | 24   |
| PU/textile waste foam                                                   | 0.59 | 65                           | 40            | 25   |
| SiO <sub>2</sub> particle aerogel                                       | 0.48 | 80-85                        | 30            | 26   |
| Coir fibers                                                             | 0.48 | 153                          | 30            | 27   |
| SA-670                                                                  | 0.60 | 15.1                         | 30            | ours |

## Supplementary Methods

### 1 Calculation of EMI shielding effectiveness

According to the Calculation theory of shielding effectiveness, when the incident EM wave is transformed at the surface of a material, the incident power could be divided into the reflected power, absorbed power and transmitted power, which could be represented by the power coefficient R (reflectivity), A (absorptivity) and T (transmissivity). The electromagnetic interference shielding effectiveness (EMI  $SE_{tot}$ ,  $SE_a$  and  $SE_r$ ) were calculated by measured S parameters ( $S_{11}$ ,  $S_{22}$ ,  $S_{12}$  and  $S_{21}$ ) with the following equations:<sup>28</sup>

$$SE_{tot} = 10\log_{10}\left(\frac{P_i}{P_t}\right) = 10\log_{10}\left(\frac{1}{T}\right) = SE_r + SE_a \quad (S1)$$

$$SE_r = 10\log_{10}\left(\frac{P_i}{P_{AV}}\right) = 10\log_{10}\left(\frac{1}{1-R}\right) \quad (S2)$$

$$SE_a = 10\log_{10}\left(\frac{P_{AV}}{P_t}\right) = 10\log_{10}\left(\frac{1-R}{T}\right) \quad (S3)$$

$$SE_{tot} = SE_r + SE_a \quad (S4)$$

$$R = |S_{11}|^2 = |S_{22}|^2 \quad (S5)$$

$$T = |S_{12}|^2 = |S_{21}|^2 \quad (S6)$$

where  $SE_{tot}$ ,  $SE_a$  and  $SE_r$  mean the total, absorption and reflection efficiency.  $P_i$  and  $P_t$  mean the power of incident and transmitted EM waves, and available power ( $P_{AV}=P_i-P_t$ ) refers to the net power entering the material.

## 2 Sound absorption performance simulation of fibrous materials

The sound absorption coefficient  $\alpha$  is given by:

$$\alpha = 1 - |R|^2 \quad (\text{S7})$$

in which the sound pressure reflection coefficient  $R$  is given by:

$$R = \frac{Z_s - \rho_0 c}{Z_s + \rho_0 c} \quad (\text{S8})$$

Where  $Z_s$  is the surface impedance and  $\rho_0 c$  represents the characteristic impedance of air. For a single layer absorber with the depth of  $d$  under a rigid back, the  $Z_s$  could be given by:

$$Z_s = -jZ_c \cot(k_c d) \quad (\text{S9})$$

Where  $Z_c$  and  $k_c$  are the characteristic impedance and complex wave number of the absorber. Based on the empirical models developed by the work of Delany and Bazley,<sup>27, 29</sup>  $Z_s$  and  $k_c$  of highly porous and homogeneous sound absorbers could be given by:

$$Z_c = \rho_0 c \left( 1 + 0.0571 \left( \frac{\rho_0 f}{\sigma} \right)^{-0.754} - j0.087 \left( \frac{\rho_0 f}{\sigma} \right)^{-0.732} \right) \quad (\text{S10})$$

$$k_c = \omega/c \left( 1 + 0.0978 \left( \frac{\rho_0 f}{\sigma} \right)^{-0.7} - j0.189 \left( \frac{\rho_0 f}{\sigma} \right)^{-0.595} \right) \quad (\text{S11})$$

where  $\rho_0$  is the air density ( $\sim 1.21 \text{ kg/cm}^3$ ),  $\omega = 2\pi f$  is the angular frequency. For the fibrous absorbers with the fibre diameter ranging from 6 to 10  $\mu\text{m}$ , the flow resistivity  $\sigma$  could be given by the following relationship<sup>30</sup>:

$$\sigma = \frac{10.56\eta(1 - \varepsilon)^{1.531}}{a^2 \varepsilon^3} \quad (\text{S12})$$

where  $\eta$  is the viscosity of air ( $1.84 \times 10^{-5} \text{ Pa s}$ ),  $a$  is the diameter of fibres and  $\varepsilon$  is the porosity of the absorber.

## References

1. J. Yang, X. Liao, G. Wang, J. Chen, W. Tang, T. Wang and G. Li, *J. Mater. Chem. C.*, 2020, **8**, 147-157.
2. J. Yang, X. Liao, J. Li, G. He, Y. Zhang, W. Tang, G. Wang and G. Li, *Compos. Sci. Technol.*, 2019, **181**, 107670.
3. M. Dai, Y. Zhai and Y. Zhang, *Chem. Eng. J.*, 2021, **421**, 127749.
4. J. Yang, X. Liao, G. Wang, J. Chen, P. Song, W. Tang, F. Guo, F. Liu and G. Li, *Compos. Sci. Technol.*, 2021, **206**, 108663.
5. D. Feng, D. Xu, Q. Wang and P. Liu, *J. Mater. Chem. C*, 2019, **7**, 7938-7946.
6. Y. Xu, Y. Yang, D.-X. Yan, H. Duan, G. Zhao and Y. Liu, *ACS Appl. Mater. Interfaces*, 2018, **10**, 19143-19152.
7. H. Duan, H. Zhu, J. Gao, D.-X. Yan, K. Dai, Y. Yang, G. Zhao, Y. Liu and Z.-M. Li, *J. Mater. Chem. A*, 2020, **8**, 9146-9159.
8. S. Zhao, Y. Yan, A. Gao, S. Zhao, J. Cui and G. Zhang, *ACS Appl. Mater. Interfaces*, 2018, **10**, 26723-26732.
9. X.-X. Wang, J.-C. Shu, W.-Q. Cao, M. Zhang, J. Yuan and M.-S. Cao, *Chem. Eng. J.*, 2019, **369**, 1068-1077.
10. P. Song, B. Liu, C. Liang, K. Ruan, H. Qiu, Z. Ma, Y. Guo and J. Gu, *Nano-micro lett.*, 2021, **13**, 1-17.
11. Y. Fei, M. Liang, L. Yan, Y. Chen and H. Zou, *Chem. Eng. J.*, 2020, **392**, 124815.
12. Y. Chen, H. Luo, H. Guo, K. Liu, C. Mei, Y. Li, G. Duan, S. He, J. Han and J. Zheng, *Carbohydr. Polym.*, 2021, 118799.
13. X. Jia, B. Shen, L. Zhang and W. Zheng, *Carbon*, 2021, **173**, 932-940.
14. Z. Lu, F. Jia, L. Zhuo, D. Ning, K. Gao and F. Xie, *Compos. Part B: Eng.*, 2021, **217**, 108853.
15. R. Bian, G. He, W. Zhi, S. Xiang, T. Wang and D. Cai, *J. Mater. Chem. C*, 2019, **7**, 474-478.
16. T. Kim, H. W. Do, K.-J. Choi, S. Kim, M. Lee, T. Kim, B.-K. Yu, J. Cheon, B.-w. Min and W. Shim, *Nano Letters*, 2021, **21**, 1132-1140.
17. Y. Li, H. Yang, X. Hao, N. Sun, J. Du and M. Cao, *J. Alloy. Compd.*, 2019, **772**, 99-104.
18. H. Duan, H. Zhu, J. Yang, J. Gao, Y. Yang, L. Xu, G. Zhao and Y. Liu, *Compos. Part. A: Appl. S.*, 2019, **118**, 41-48.
19. S. H. Ryu, Y. K. Han, S. J. Kwon, T. Kim, B. M. Jung, S.-B. Lee and B. Park, *Chem. Eng. J.*, 2022, **428**, 131167.
20. L. Cao, Y. Si, Y. Wu, X. Wang, J. Yu and B. Ding, *Nanoscale*, 2019, **11**, 2289-2298.
21. D. Zong, L. Cao, X. Yin, Y. Si, S. Zhang, J. Yu and B. Ding, *Nat. Communications*, 2021, **12**, 6599.

22. Y. Xie, L. Wang, Y. Peng, D. Ma, L. Zhu, G. Zhang and X. Wang, *Chem. Eng. J.* 2021, **416**, 128994.
23. U. Berardi and G. Iannace, *Appl. Acoust.*, 2017, **115**, 131-138.
24. M. J. Nine, M. Ayub, A. C. Zander, D. N. Tran, B. S. Cazzolato and D. Losic, *Adv. Funct. Mater.*, 2017, **27**, 1703820.
25. A.-E. Tiuc, H. Vermeşan, T. Gabor and O. Vasile, *Energy Procedia*, 2016, **85**, 559-565.
26. C. Buratti, F. Merli and E. Moretti, *Energ. Buildings*, 2017, **152**, 472-482.
27. M. Hosseini Fouladi, M. Ayub and M. Jailani Mohd Nor, *Appl. Acoust.*, 2011, **72**, 35-42.
28. M. Peng and F. Qin, *J. Appl. Phys.*, 2021, **130**, 225108.
29. M. Delany and E. Bazley, *Appl. Acoust.*, 1970, **3**, 105-116.
30. F. P. Mechel., *Formulas of acoustics*, Springer, New York, 2002.
